# Supplementary material for: Highly reversible lithium storage in a conversion-type ZnCo2O4anode promoted by NiCl2−xFxhydrate
Source: Royal Society of Chemistry journal article supplement (doi:10.1039/c9ta13183c), 2020-01-01
Supplement: c9ta13183c1.pdf [file c9ta13183c1.pdf]

## Supporting information

### Highly reversible lithium storage in conversion-type $\text{ZnCo}_2\text{O}_4$ anode promoted by $\text{NiCl}_{2-x}\text{F}_x$ hydrate

Jiaojiao Deng,<sup>a†</sup> Xiaoliang Yu,<sup>b†</sup> Jie Tang,<sup>\*b</sup> Lihan Zhang,<sup>a</sup> Kun Zhang,<sup>b</sup> Shiqi Lin,<sup>b</sup>  
Baohua Li<sup>\*a</sup>

<sup>a</sup> Engineering Laboratory for Functionalized Carbon Materials, Tsinghua Shenzhen International Graduate School, 518055, PR China. E-mail: libh@mail.sz.tsinghua.edu.cn

<sup>b</sup> National Institute for Materials Science, 1-2-1 Sengen, Tsukuba, Ibaraki, 305-0047, Japan. E-mail: tang.jie@nims.go.jp

<sup>†</sup> These authors contributed equally to this work.

#### Experimental Section

*Synthesis of ZCO:*  $\text{ZnCo}_2\text{O}_4$  microspheres were prepared according to a solvothermal synthesis method reported in our previous work.<sup>[sliced]</sup> Typically, 5 mmol of  $\text{Zn}(\text{NO}_3)_2 \cdot 6\text{H}_2\text{O}$ , 10 mmol of  $\text{Co}(\text{NO}_3)_2 \cdot 6\text{H}_2\text{O}$  and 180 mmol urea were dispersed in 70 mL of ethylene glycol with continuous stirring. After turning into homogenous solution, the above mixture was transferred into a 100 mL Teflon lined stainless-steel autoclave and heated at 200 °C for 24 hours, before cooling down to room temperature. The obtained products were washed several times by water and ethanol, and collected by vacuum filtration, and then dried in 80 °C oven for 12 hours. Finally, by annealing the precursors at 600 °C for 4 h in air with a heating rate of 1 °C min<sup>-1</sup>,  $\text{ZnCo}_2\text{O}_4$  microspheres were acquired.

*Synthesis of ZCO/H-NCF and ZCO/NCF composites:* 1 ml of 4 mM  $\text{NH}_4\text{F}$  aqueous solution was added into 2 ml of 1 mM  $\text{NiCl}_2$  aqueous solution under vigorous stirring drop by drop. The water was evaporated by heating and stirring the mixture at 85 °C. The resulting sample was annealed at 400 °C for 2 h under Ar atmosphere, with a

heating rate of 5 °C min<sup>-1</sup>, then the NiCl<sub>2-x</sub>F<sub>x</sub> product was obtained. ZCO/H-NCF was prepared by mixing ZCO and NiCl<sub>2-x</sub>F<sub>x</sub> in de-ioned water with a mass ratio of 7:3. The mixture was then heated at 85 °C with stirring until all free water was evaporated. The product was collected and designated as ZCO/H-NCF. ZCO/NCF was further obtained by annealing at 280 °C for 4 h in Ar atmosphere, with a heating rate of 5 °C min<sup>-1</sup>.

*Material Characterization:* The morphologies of the materials were checked by field emission scanning electron microscopy (FE-SEM, JSM-6500) and transmission electron microscopy (TEM, FEI Tecnai G2 F30). X-ray diffraction (XRD) patterns were identified on a Rigaku D/max 2500 diffractometer with Cu K $\alpha$  radiation ( $\lambda$  = 1.5418 Å). An X-ray photoelectron spectroscopy (XPS, PHI 5000 VersaProbe II) was applied to characterize the chemical bonding states of samples and electrode materials upon lithiation/delithiation. Raman spectra of samples were obtained on a Microlaser confocal Raman spectrometer (HORIBA LabRAM HR800). Fourier transform infrared spectroscopy (FT-IR, MDTC-EQ-M13-01) was used to obtain the FT-IR spectra of samples. The thermal stability of the samples was measured by thermogravimetric (TGA, Hitachi HT-Seiko Instrument Exter 6300) in nitrogen heating from room temperature to 400 °C with a heating rate of 10 °C min<sup>-1</sup>.

*Electrochemical Measurement:* The lithium storage performance of electrodes was measured by 2032-type coin cells. Active materials (ZCO, ZCO/H-NCF and ZCO/NCF), carbon black (super P) and polyvinylidene fluoride (PVDF) were mixed in N-methyl-2-pyrrolidinone (NMP) solvent with a mass ratio of 8:1:1. The obtained slurry was pasted onto copper foil after stirring for 6 h, followed by drying in a vacuum oven for 12 h at 110 °C. Then the electrode film was punched into a disk with a diameter of 15 mm. The mass of the active material was controlled at  $\approx$ 1 mg cm<sup>-2</sup>. The electrolyte was LiPF<sub>6</sub> (1 M) in a mixed solvent of ethylene carbonate (EC)/diethyl carbonate (DEC) (volume ratio of 1:1). The galvanostatic charge-discharge tests were conducted using a Land 2001A battery test system in a voltage range of 0.01-3.0 V at room temperature. Cyclic voltammetry (CV) tests were performed on a VMP3 electrochemical station with a scan rate of 0.1 mV s<sup>-1</sup> in the same potential range.

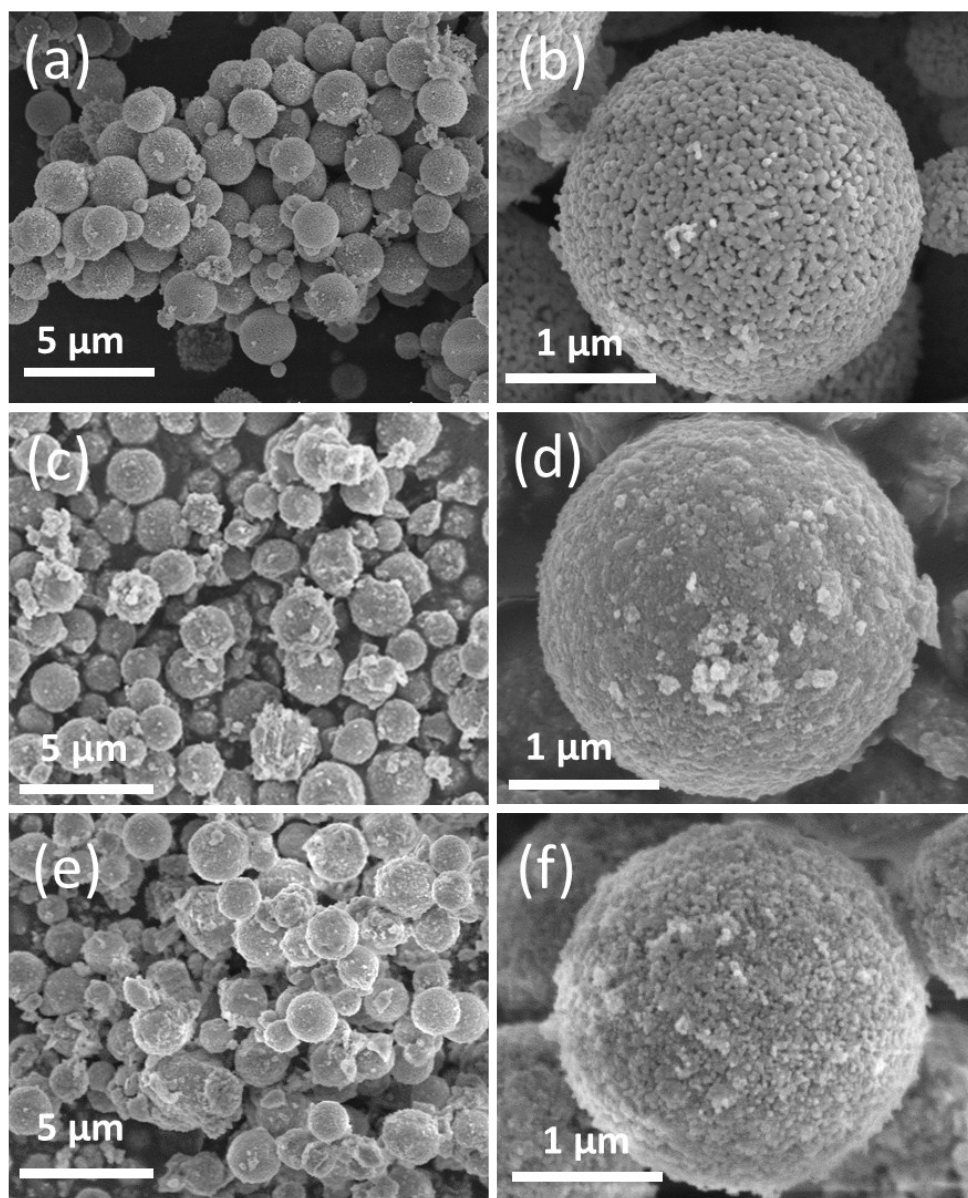

Fig. S1 SEM images of ZCO (a, b), ZCO/H-NCF (c, d) and ZCO/NCF (e, f)

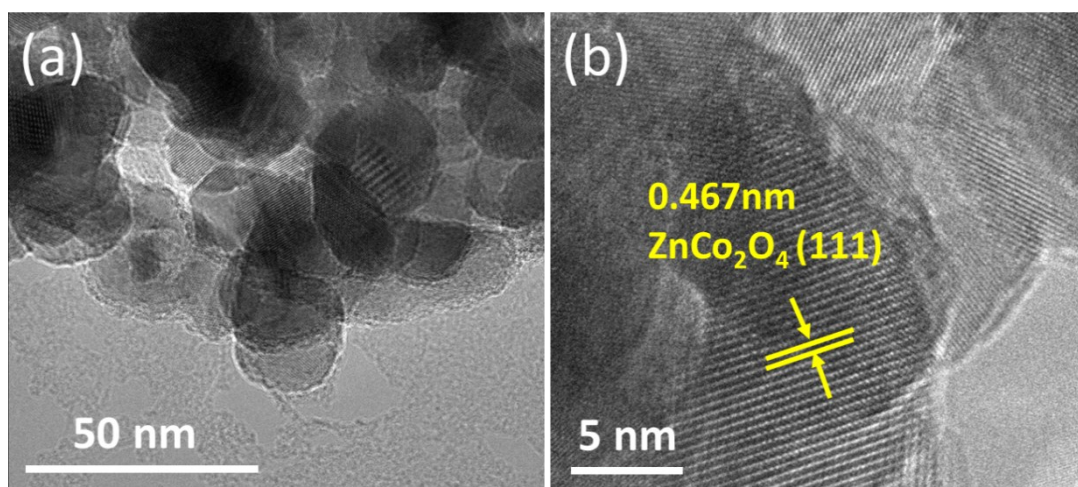

Fig. S2 TEM (a) and HRTEM (b) image of ZCO.

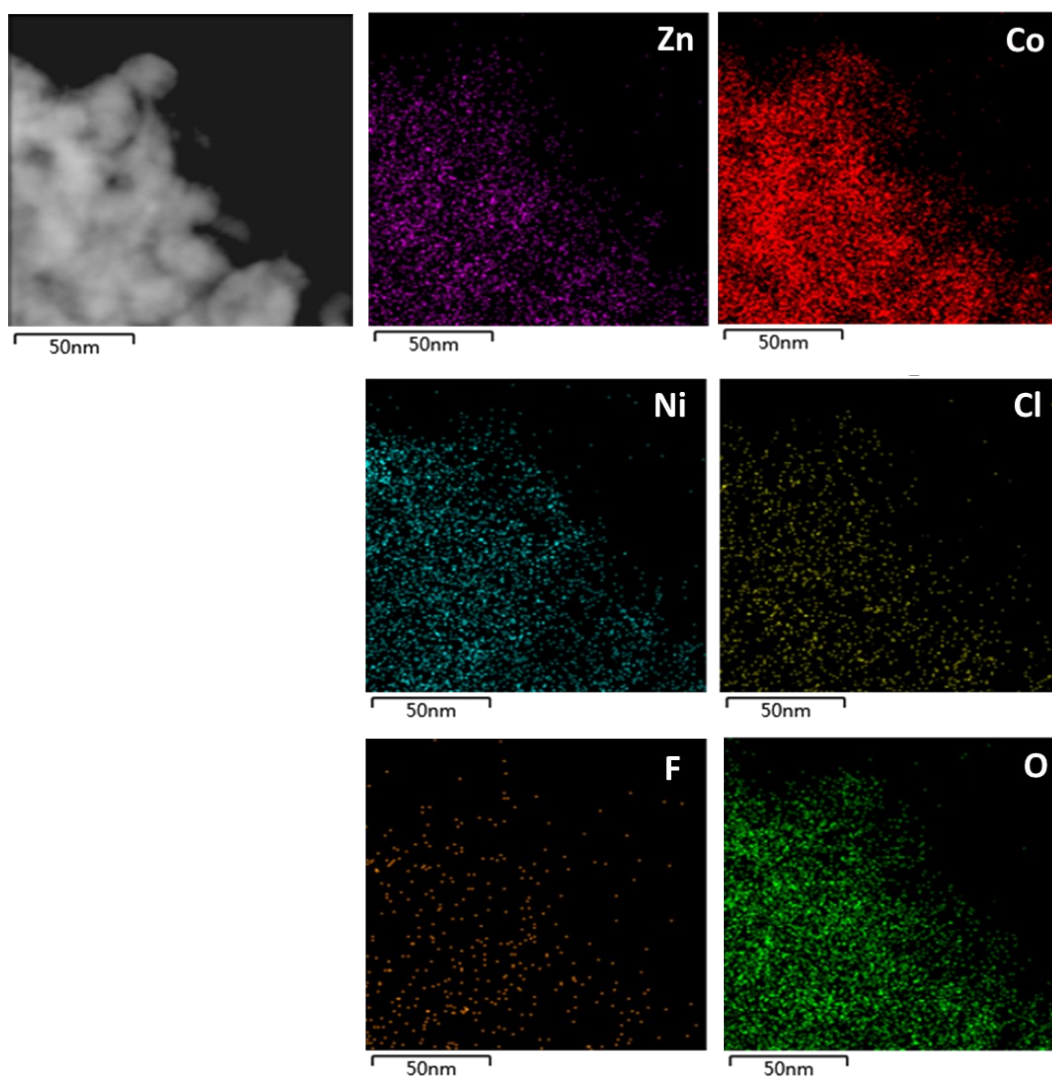

Fig. S3 Dark field scanning transmission electron microscope (STEM) image and corresponding EDS mapping of ZCO/H-NCF.

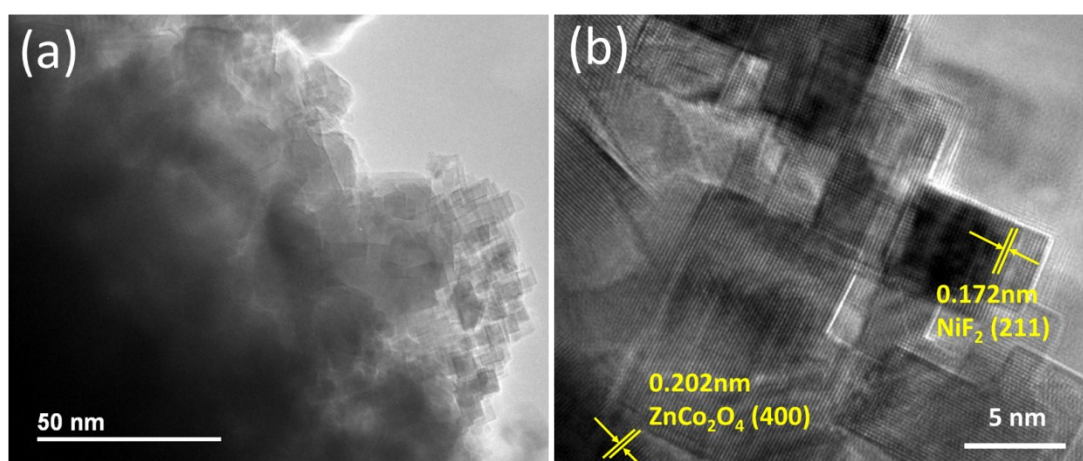

Fig. S4 TEM (a) and HRTEM (b) image of ZCO-NCF.

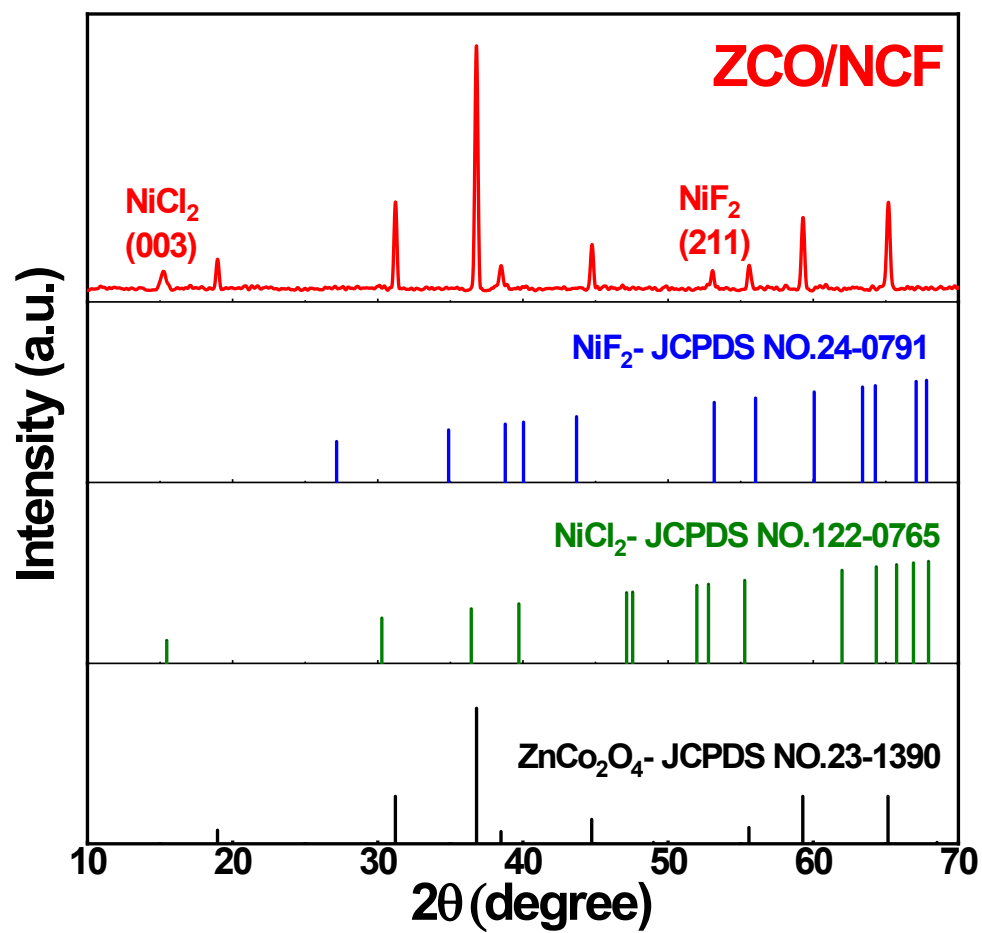

Fig. S5 XRD pattern of ZCO/NCF



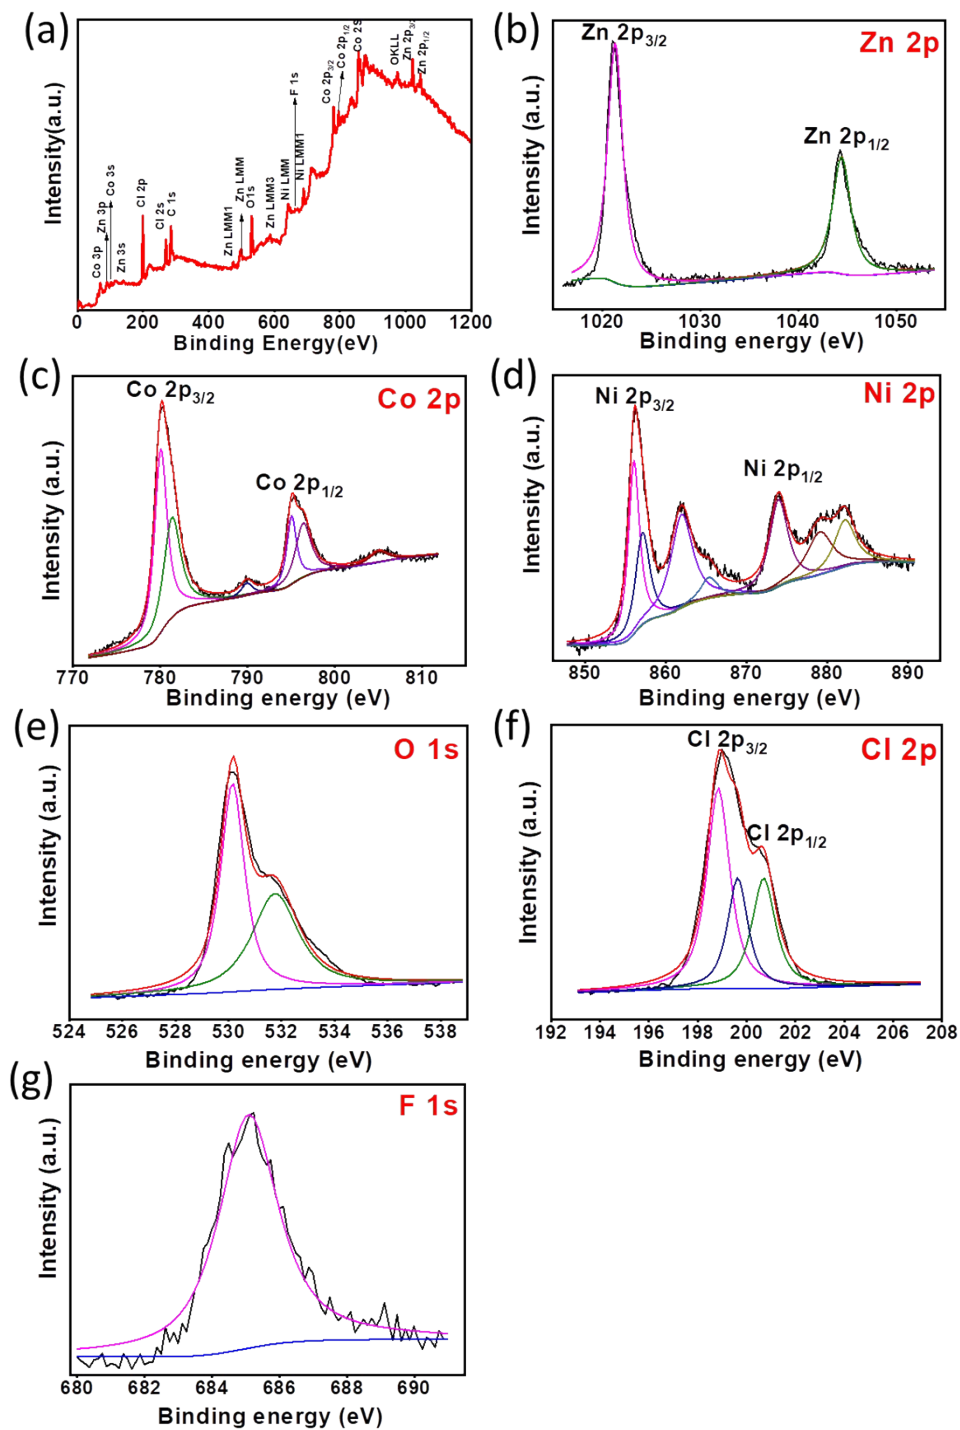

Fig. S6 (a) The full XPS spectrum of ZCO/H-NCF; (b) Zn 2p, (c) Co 2p, (d) Ni 2p, (e) O 1s, (f) Cl 2p, and (g) F 1s XPS spectra of ZCO/H-NCF.

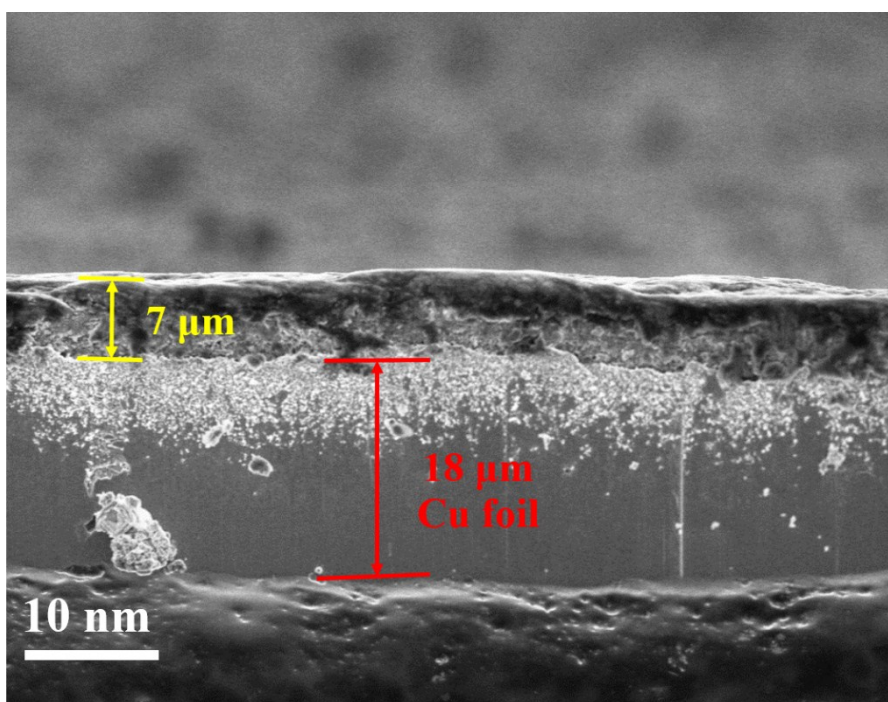

Fig. S7 Cross-sectional SEM image of the ZCO/H-NCF electrode

The areal mass loading is  $1 \text{ mg cm}^{-2}$  and the thickness is  $7 \text{ μm}$ , the gravimetric capacity of ZCO/H-NCF electrode was  $1089 \text{ mAh g}^{-1}$ . Therefore the mass density and the volumetric capacity of the ZCO/H-NCF electrode can be calculated to be  $1.43 \text{ g cm}^{-3}$  and  $1557 \text{ mAh cm}^{-3}$ , respectively.

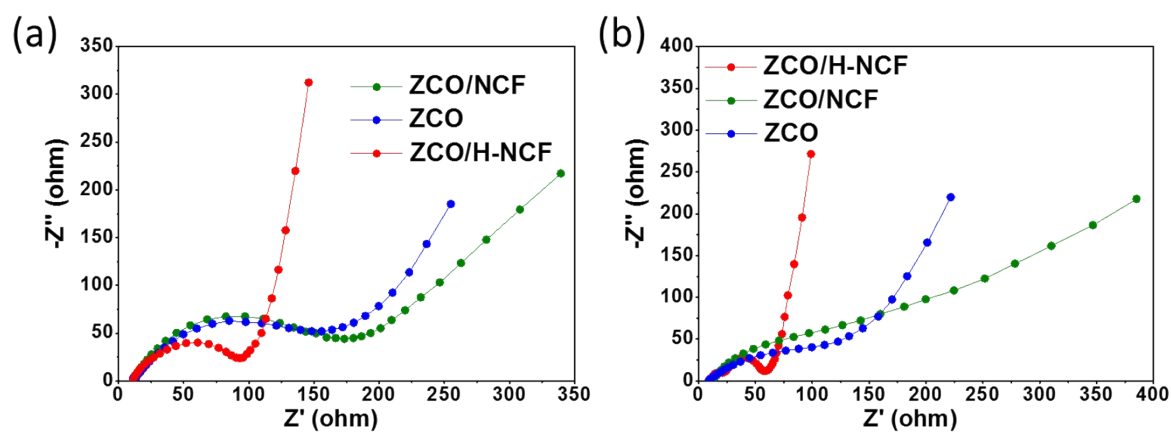

Fig. S8 EIS spectrum of ZCO, ZCO/H-NCF and ZCO/NCF electrodes at pristine state (a) and after 100 cycles at  $1 \text{ A g}^{-1}$  (b).

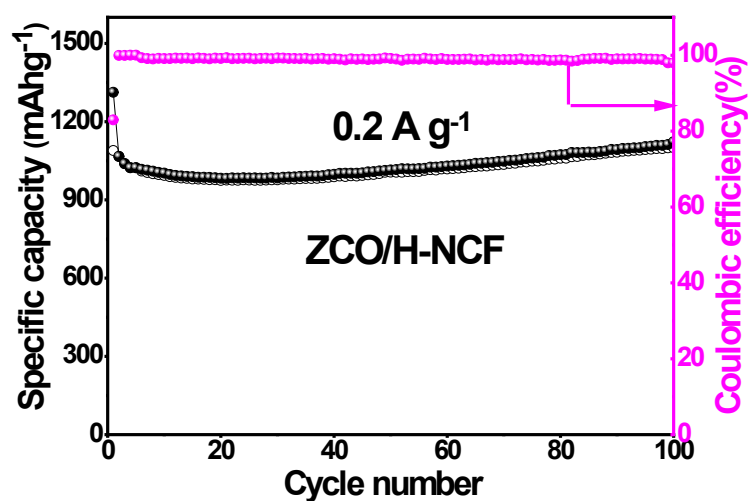

Fig. S9 Cycling performance of ZCO/H-NCF at a current density of 0.2 A g<sup>-1</sup>.

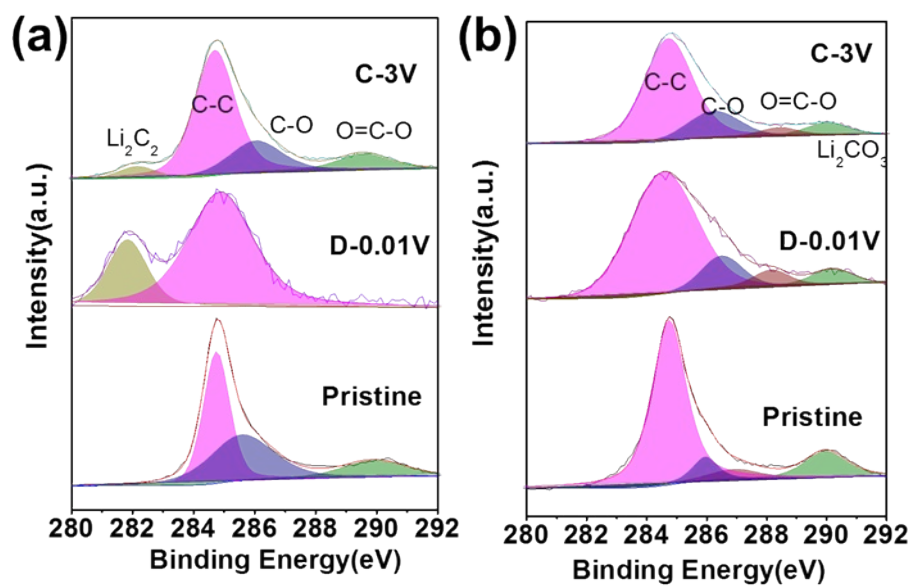

Fig. S10 C 1s XPS evolution of SEI layer in ZCO electrode (a) and ZCO/NCF electrode (b) based on the pristine, fully lithiated, full delithiated states in the first cycle.



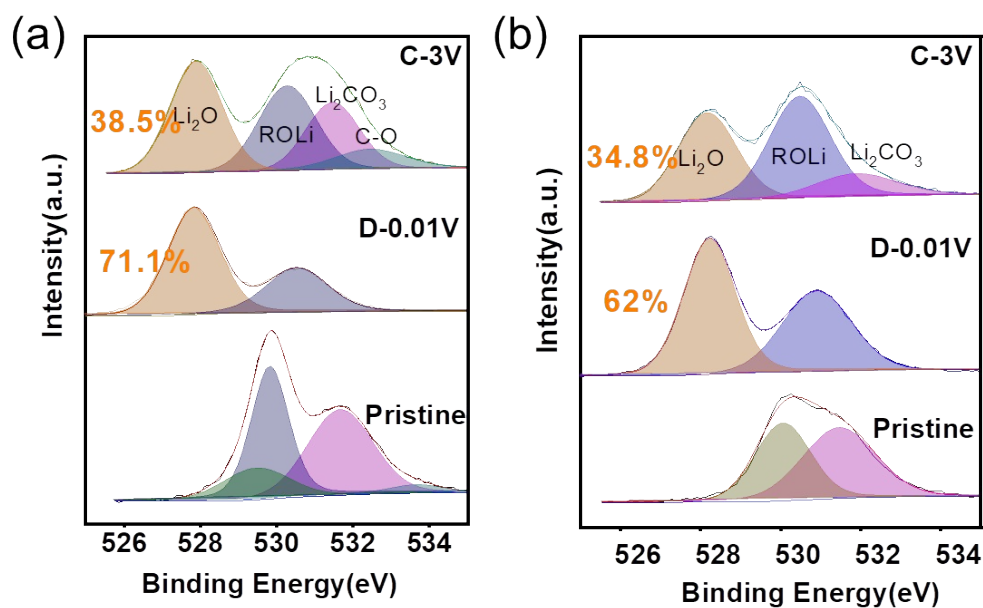

Fig. S11 O 1s XPS evolution of ZCO electrode (a) and ZCO/NCF electrode (b) based on the pristine, fully lithiated, full delithiated states in the first cycle.

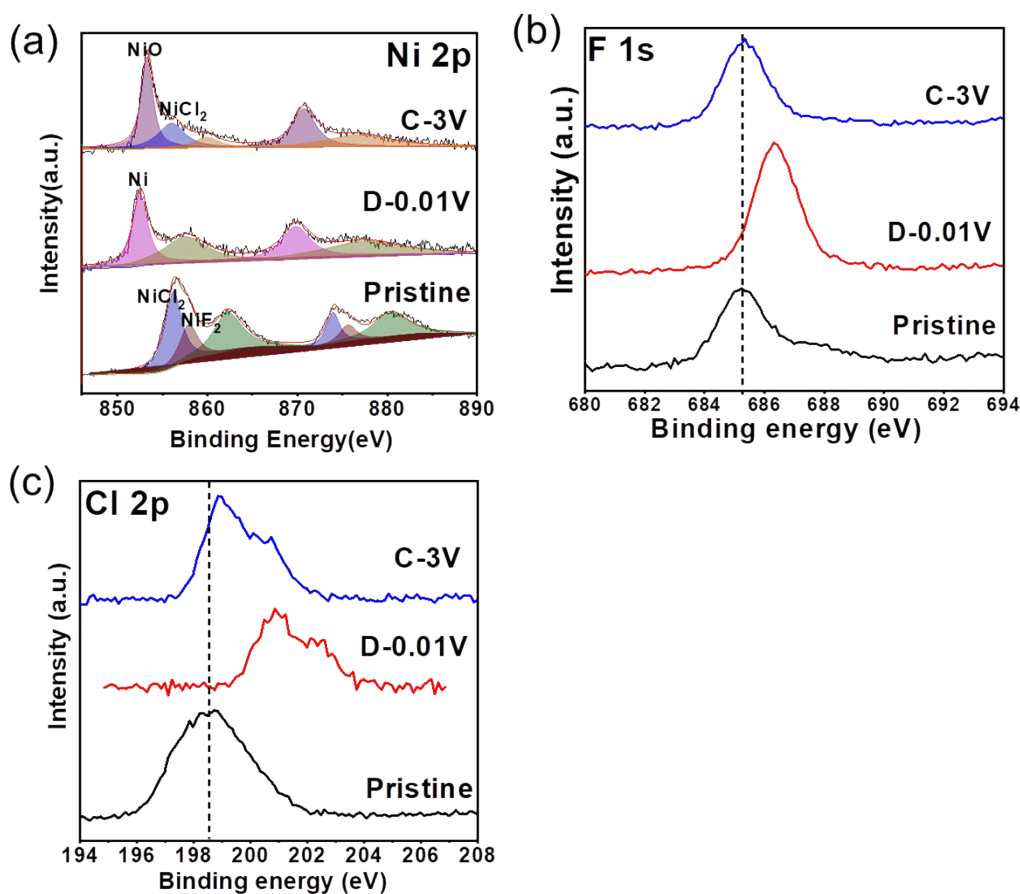

Fig. S12 (a) Ni 2p, (b) F 1s and (c) Cl 2p XPS evolution of ZCO/H-NCF electrode based on the pristine, fully lithiated, full delithiated states in the first cycle.

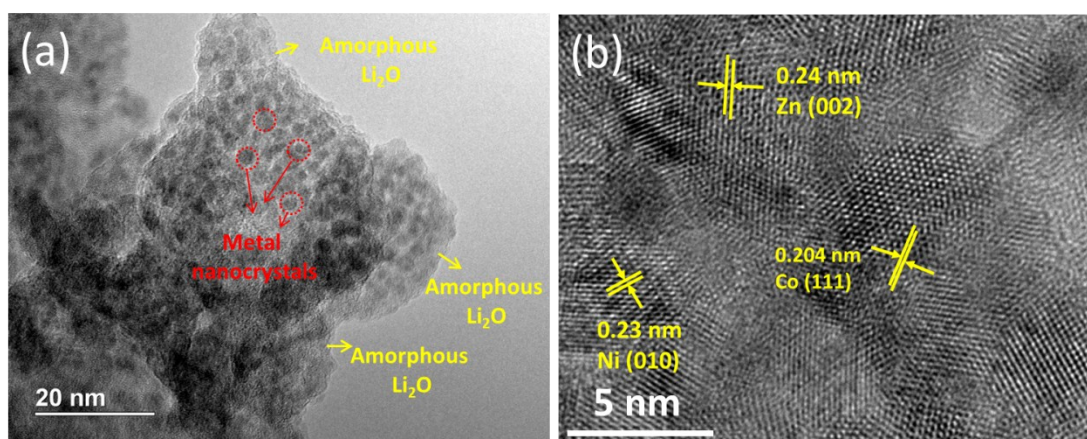

Fig. S13 TEM (a) and high-resolution TEM (b) image of the ZCO/H-NCF electrode after full lithiation.

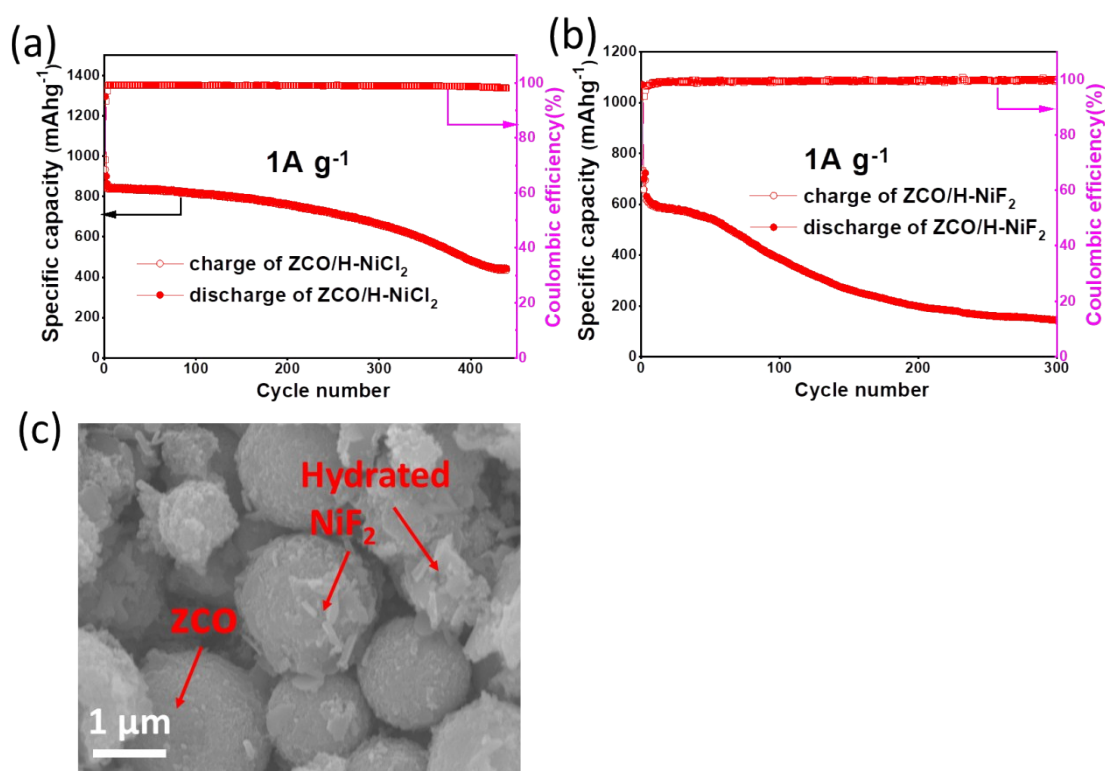

Fig. S14 Cycling performance of the  $\text{ZnCo}_2\text{O}_4$ /hydrated  $\text{NiCl}_2$  hybrid (ZCO/H- $\text{NiCl}_2$ ) (a) and the  $\text{ZnCo}_2\text{O}_4$ /hydrated  $\text{NiF}_2$  hybrid (ZCO/H- $\text{NiF}_2$ ) (b) at a current density of 1 A g<sup>-1</sup>. SEM image of ZCO/H- $\text{NiF}_2$  (c).

ZCO/H- $\text{NiCl}_2$  and ZCO/H- $\text{NiF}_2$  were prepared by the same process as that of ZCO/H-NCF except that only  $\text{NiCl}_2$  or  $\text{NiF}_2$  was added during the solution reaction. The electrochemical performance of ZCO/H- $\text{NiF}_2$  is not only poorer than that of ZCO/H-NCF but also much poorer than that of the ZCO anode. This may be ascribed to the low solubility of  $\text{NiF}_2$  in water (2.5 g/100 mL). It generates the uneven hybrid of ZCO and H- $\text{NiF}_2$  (see Fig. S14c) during solution synthesis process and thus poor electrochemical performance.

Table S1 Performance comparison between our ZCO/H-NCF anode and previously reported advanced AB<sub>2</sub>O<sub>4</sub>-type transition metal oxide anodes.

| Sample                                                                        | Initial<br>Coulombic<br>efficiency | Rate performance                                    | Cycling stability                                                   | Ref.         |
|-------------------------------------------------------------------------------|------------------------------------|-----------------------------------------------------|---------------------------------------------------------------------|--------------|
| CoFe <sub>2</sub> O <sub>4</sub> Hollow Spheres                               | 72.7%<br>at 0.1 A g <sup>-1</sup>  | 46.2% capacity<br>retention at 2 A g <sup>-1</sup>  | 70.5% capacity retention<br>over 600 cycles at 1 A g <sup>-1</sup>  | 1            |
| ZnCo <sub>2</sub> O <sub>4</sub> microspheres<br>/NiSi <sub>x</sub> nanowires | 71.2 %<br>at 0.1 A g <sup>-1</sup> | 26.5% capacity<br>retention at 4 A g <sup>-1</sup>  | 72.4% capacity retention<br>over 340 cycles at 1 A g <sup>-1</sup>  | 2            |
| NiCo <sub>2</sub> V <sub>2</sub> O <sub>8</sub> Yolk–Double<br>Shell Spheres  | 60%<br>at 0.2 A g <sup>-1</sup>    | 28.6% capacity<br>retention at 10 A g <sup>-1</sup> | ~69% capacity retention<br>over 500 cycles at 1 A g <sup>-1</sup>   | 3            |
| Co <sub>3</sub> O <sub>4</sub> /NiO/C<br>hybrids                              | 60%<br>at 0.2 A g <sup>-1</sup>    | 47.4% capacity<br>retention at 4 A g <sup>-1</sup>  | 76.5% capacity retention<br>over 1000 cycles at 1 A g <sup>-1</sup> | 4            |
| Hollow Co <sub>3</sub> O <sub>4</sub><br>Microspheres                         | 65.3%<br>at 0.05 A g <sup>-1</sup> | 22.9% capacity<br>retention at 2 A g <sup>-1</sup>  | 79.7% capacity retention<br>over 1000 cycles at 1 A g <sup>-1</sup> | 5            |
| ZCO/H-NCF                                                                     | 83%<br>at 0.2 A g <sup>-1</sup>    | 66.3% capacity<br>retention at 5 A g <sup>-1</sup>  | 75% capacity retention<br>over 1000 cycles at 1 A g <sup>-1</sup>   | This<br>work |

## References

1. C. Wang, H. Su, Y. Ma, D. Yang, Y. Dong, D. Li, L. Wang, Y. Liu and J. Zhang, *ACS Appl. Mater. Interfaces*, 2018, **10**, 28679-28685.
2. H. Chen, Q. Zhang, J. Wang, Q. Wang, X. Zhou, X. Li, Y. Yang and K. Zhang, *Nano Energy*, 2014, **10**, 245-258.
3. Y. Lu, J. Nai and X. W. Lou, *Angew. Chem. Int. Ed.*, 2018, **57**, 2899-2903.
4. Y. Wang, M. Kong, Z. Liu, C. Lin and Y. Zeng, *J. Mater. Chem. A*, 2017, **5**, 24269-24274.
5. C. Hou, Y. Hou, Y. Fan, Y. Zhai, Y. Wang, Z. Sun, R. Fan, F. Dang and J. Wang, *J. Mater. Chem. A*, 2018, **6**, 6967-6976.
